# Supplementary material for: Quantitative trait loci for energy balance traits in an advanced intercross line derived from mice divergently selected for heat loss
Source: PubMed Central journal article supplement (PMC4045330; doi:10.7717/peerj.392), 2014-05-27

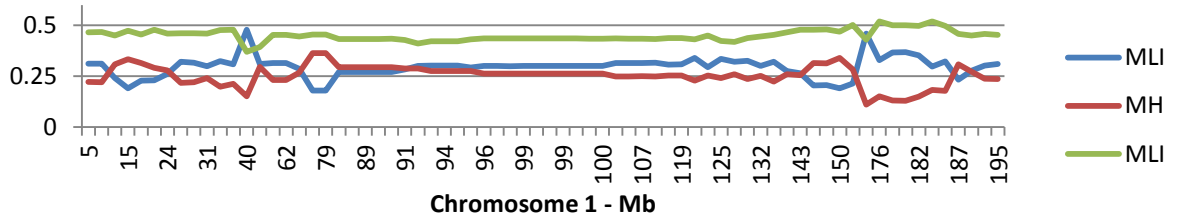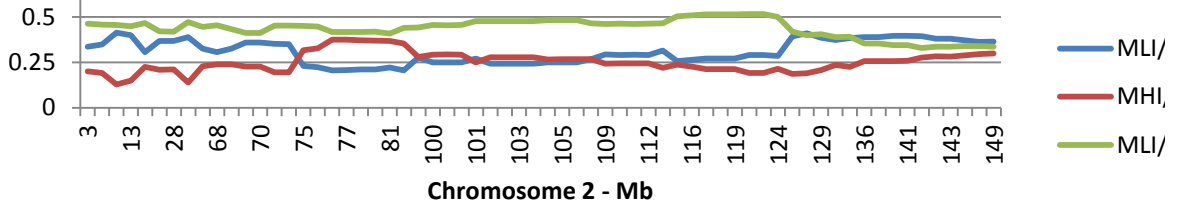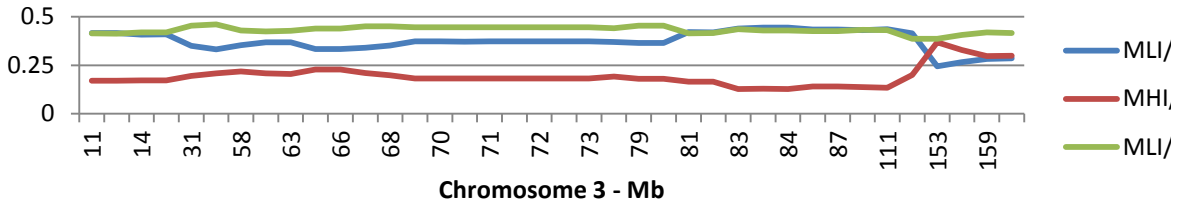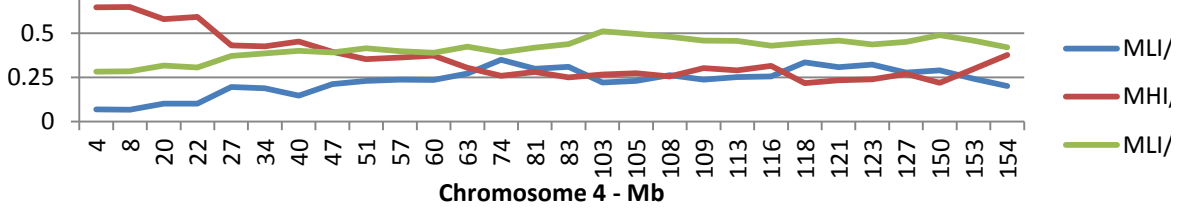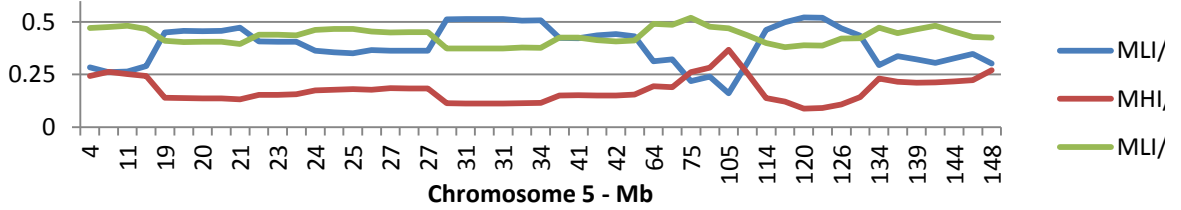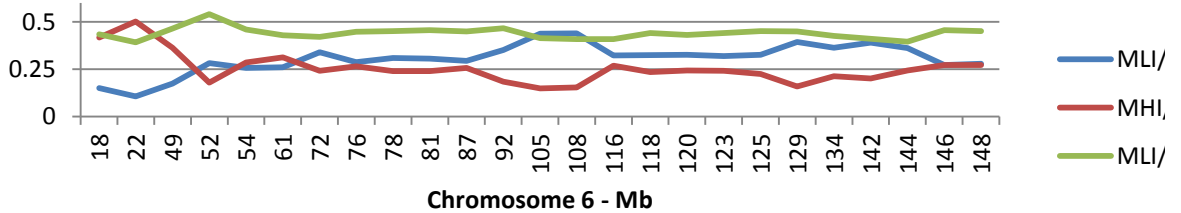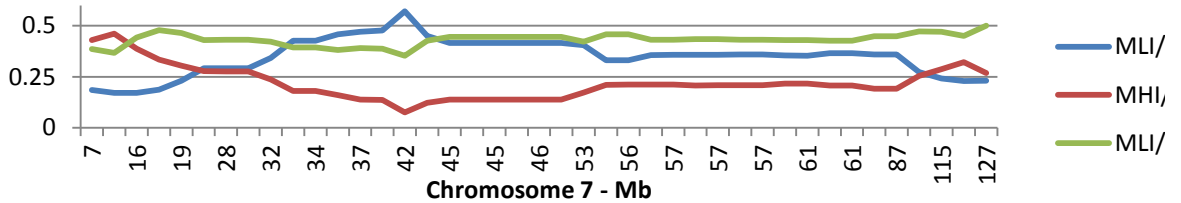

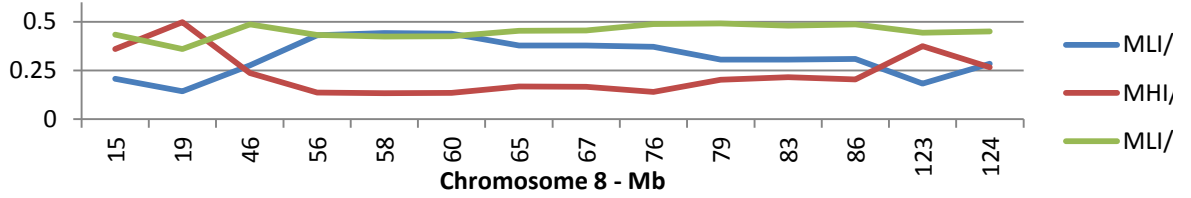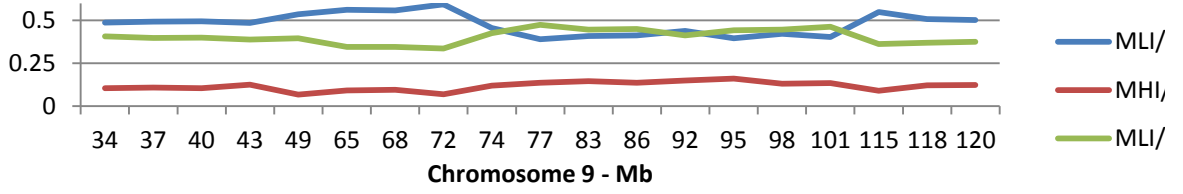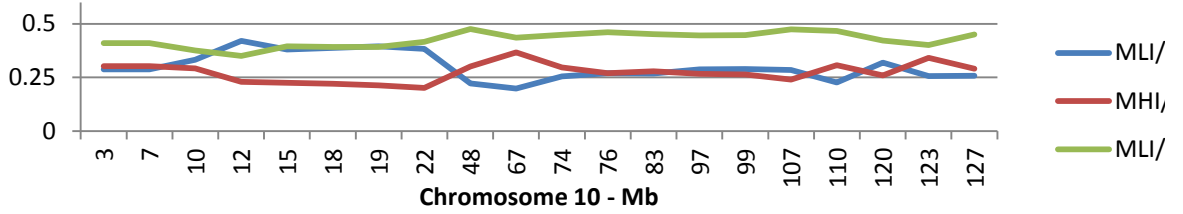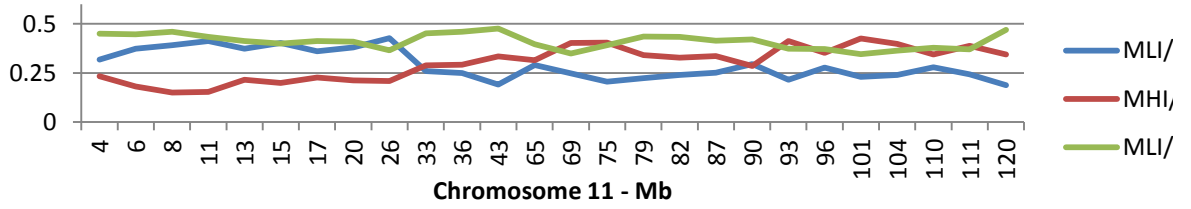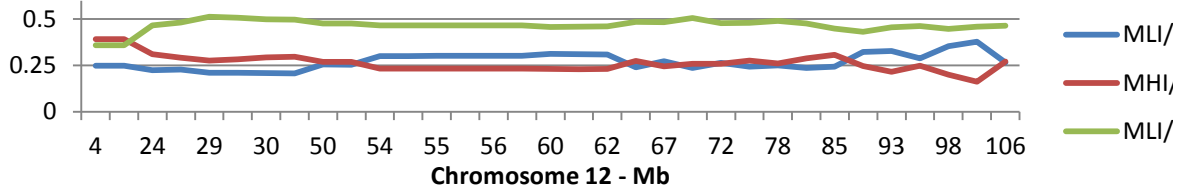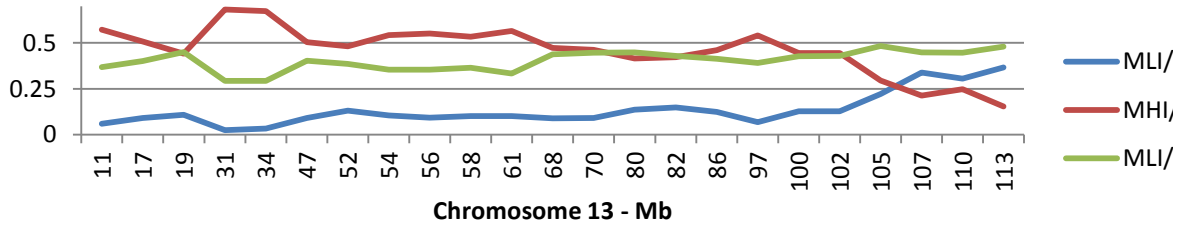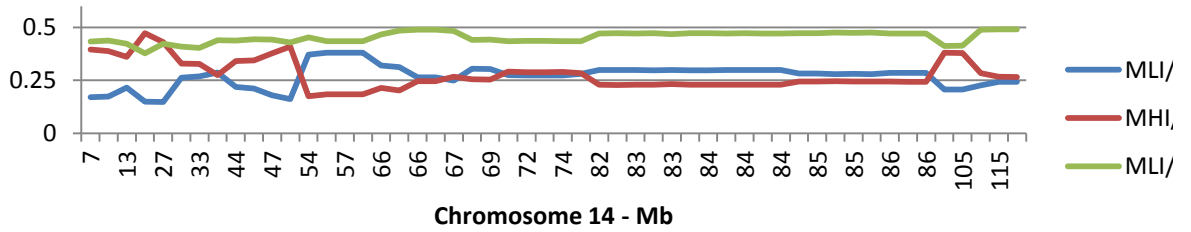

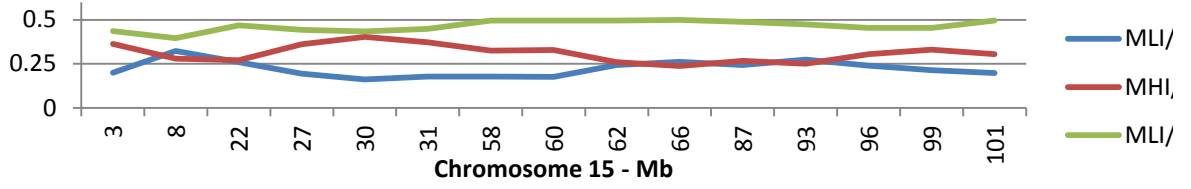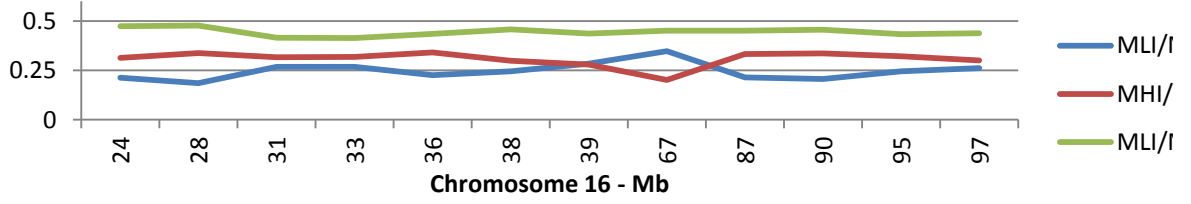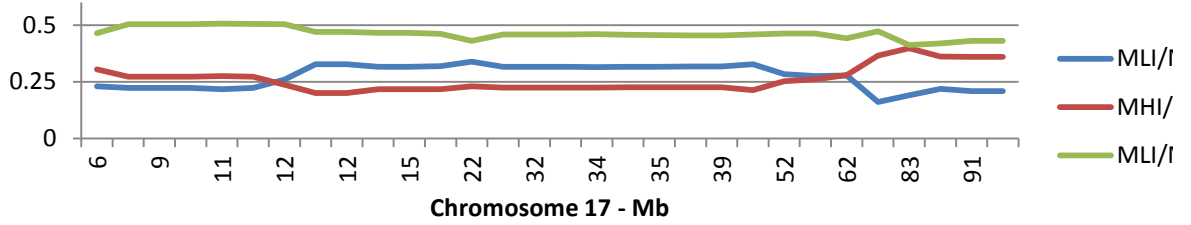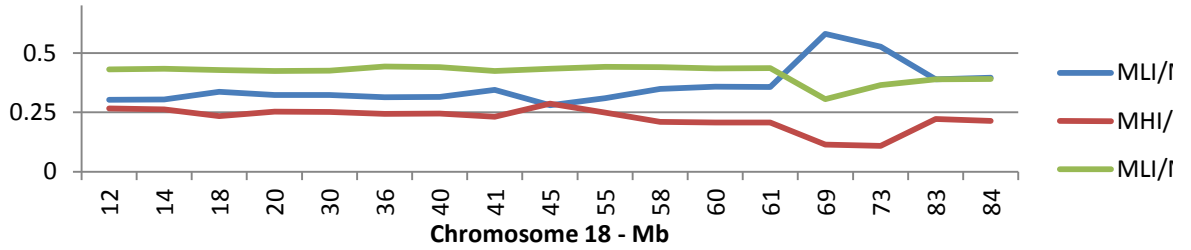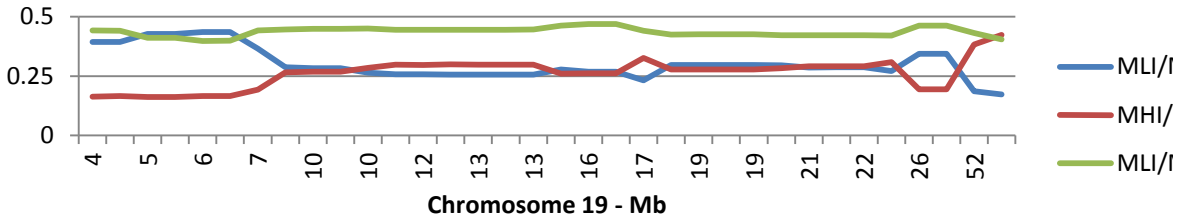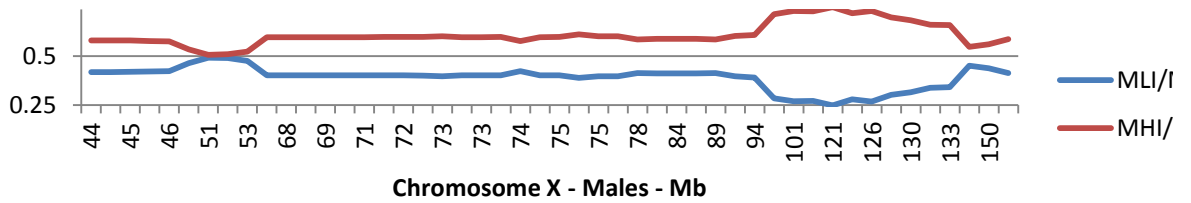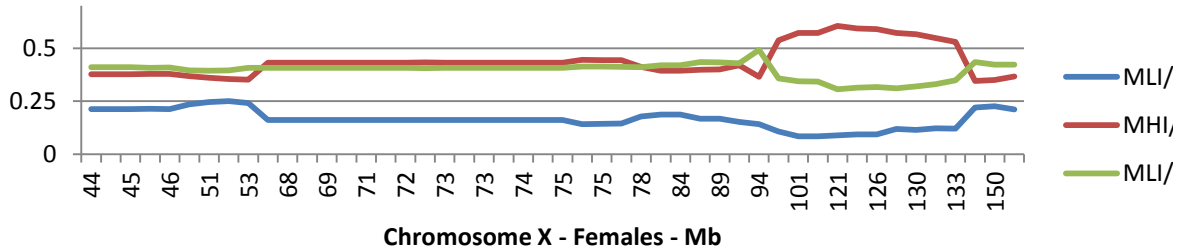

Supplement: peerj-02-392-s002.pdf [file peerj-02-392-s002.pdf]
