# Supplementary material for: Quantitative trait loci for energy balance traits in an advanced intercross line derived from mice divergently selected for heat loss
Source: PubMed Central journal article supplement (PMC4045330; doi:10.7717/peerj.392), 2014-05-27
Supplement: peerj-02-392-s001.pdf [file peerj-02-392-s001.pdf]

| Marker         | Chromosome | Coordinate | Marker          | Chromosome | Coordinate |
|----------------|------------|------------|-----------------|------------|------------|
| rs3677817      | 1          | 5.197303   | rs13476089      | 1          | 122.457718 |
| rs13475712     | 1          | 7.41187    | rs3697826       | 1          | 124.896697 |
| rs3726952      | 1          | 12.906283  | rs13476098      | 1          | 126.400694 |
| rs13475735     | 1          | 15.147784  | rs6355835       | 1          | 130.487043 |
| rs3658044      | 1          | 19.498836  | rs3713473       | 1          | 131.948608 |
| rs3711079      | 1          | 22.156681  | rs3700475       | 1          | 138.09948  |
| rs4222215      | 1          | 24.234159  | CEL-1_140588762 | 1          | 140.588762 |
| rs13475771     | 1          | 25.676777  | rs13476147      | 1          | 142.551146 |
| rs3677683      | 1          | 27.510356  | rs6186115       | 1          | 144.615698 |
| rs6237824      | 1          | 30.982111  | rs6364156       | 1          | 146.112228 |
| UT_1_35.224766 | 1          | 34.822105  | gnf01.149.342   | 1          | 149.831572 |
| rs13475816     | 1          | 37.880203  | rs13476187      | 1          | 154.18791  |
| rs13475821     | 1          | 39.844439  | rs8242852       | 1          | 171.128307 |
| mCV23591750    | 1          | 51.617463  | rs3143355       | 1          | 175.96311  |
| rs8254826      | 1          | 61.776437  | rs13476259      | 1          | 177.399967 |
| rs3716105      | 1          | 61.943426  | rs6301437       | 1          | 179.84146  |
| rs6356603      | 1          | 75.36232   | CEL-1_181947877 | 1          | 181.947877 |
| rs6321468      | 1          | 78.484909  | rs3693165       | 1          | 183.213131 |
| rs3667200      | 1          | 78.622208  | rs6154379       | 1          | 184.815448 |
| rs13475972     | 1          | 89.01772   | rs13476290      | 1          | 186.816908 |
| rs13475960     | 1          | 89.120328  | gnf01.195.387   | 1          | 191.348177 |
| rs6250696      | 1          | 89.196129  | rs4222922       | 1          | 193.166401 |
| rs13475973     | 1          | 89.403365  | rs6246360       | 1          | 194.9579   |
| gnf01.089.691  | 1          | 89.659368  | rs13476318      | 2          | 3.076675   |
| rs3022827      | 1          | 90.567434  | rs13476330      | 2          | 5.79421    |
| rs13475982     | 1          | 92.258955  | rs6240512       | 2          | 10.929543  |
| rs13475988     | 1          | 93.553382  | rs13476352      | 2          | 13.387323  |
| rs13475989     | 1          | 93.819709  | rs8250941       | 2          | 25.427137  |
| rs13475991     | 1          | 94.403364  | rs3718405       | 2          | 27.249691  |
| rs3675505      | 1          | 95.019059  | rs6181760       | 2          | 27.847598  |
| rs6342650      | 1          | 96.400818  | rs13476429      | 2          | 35.357114  |
| rs6358447      | 1          | 97.506398  | rs13476553      | 2          | 66.906537  |
| rs13476003     | 1          | 97.677389  | rs13476556      | 2          | 67.617045  |
| CEL-1_98681809 | 1          | 98.681809  | rs6371268       | 2          | 68.927682  |
| CEL-1_98799654 | 1          | 98.799654  | rs13476560      | 2          | 69.403391  |
| gnf01.099.019  | 1          | 99.03077   | rs13476563      | 2          | 70.070631  |
| rs3695980      | 1          | 99.464143  | rs3682843       | 2          | 71.050924  |
| rs13476012     | 1          | 99.797518  | rs3670752       | 2          | 71.26882   |
| rs13476014     | 1          | 100.146917 | rs3683059       | 2          | 75.399681  |
| rs3685663      | 1          | 100.268247 | rs6248415       | 2          | 76.480252  |
| rs3717264      | 1          | 103.113538 | mCV25095764     | 2          | 76.990271  |
| rs3664662      | 1          | 104.472398 | rs3711780       | 2          | 77.245946  |
| rs3664301      | 1          | 107.059245 | CEL-2_79237503  | 2          | 79.237503  |
| rs3685919      | 1          | 109.634975 | rs13476594      | 2          | 79.662978  |
| rs3725409      | 1          | 116.434018 | rs3722345       | 2          | 80.509747  |
| rs3695581      | 1          | 118.500635 | rs13476639      | 2          | 92.720804  |
| rs3667720      | 1          | 120.697988 | rs4223268       | 2          | 93.313855  |

|                 |   |            |                |   |            |
|-----------------|---|------------|----------------|---|------------|
| rs13476663      | 2 | 99.952945  | rs6224355      | 3 | 66.3279    |
| CEL-2_100344390 | 2 | 100.34439  | rs13477165     | 3 | 66.436519  |
| rs6249987       | 2 | 100.974556 | rs6226544      | 3 | 67.856811  |
| rs13476667      | 2 | 101.477932 | CEL-3_68001820 | 3 | 68.00182   |
| rs13476669      | 2 | 101.877243 | rs13477178     | 3 | 70.089276  |
| rs6155648       | 2 | 102.059025 | rs6198234      | 3 | 70.36143   |
| rs3700286       | 2 | 102.525512 | CEL-3_70552044 | 3 | 70.552044  |
| rs3143810       | 2 | 103.177373 | CEL-3_70697605 | 3 | 70.697605  |
| rs3674721       | 2 | 104.594142 | rs3698109      | 3 | 71.209119  |
| mCV25337624     | 2 | 105.399199 | rs6264454      | 3 | 71.858927  |
| rs13476684      | 2 | 105.859705 | rs3715136      | 3 | 72.730362  |
| rs13476689      | 2 | 107.356662 | rs13477190     | 3 | 73.392003  |
| rs13476693      | 2 | 109.285116 | rs13477210     | 3 | 77.646357  |
| rs3022892       | 2 | 109.891529 | rs3715352      | 3 | 78.618892  |
| rs13476697      | 2 | 110.552699 | rs13477215     | 3 | 78.622271  |
| rs13476700      | 2 | 111.672465 | rs3659866      | 3 | 81.285486  |
| rs3693678       | 2 | 112.367495 | rs6305129      | 3 | 81.508202  |
| rs3701250       | 2 | 114.662573 | gnf03.079.138  | 3 | 82.509078  |
| rs6276129       | 2 | 116.113235 | rs13477233     | 3 | 83.880528  |
| rs3677413       | 2 | 116.603199 | rs3708227      | 3 | 84.422484  |
| rs3723406       | 2 | 117.650393 | rs6376008      | 3 | 87.149248  |
| rs13476728      | 2 | 118.595838 | rs13477244     | 3 | 87.394444  |
| rs6340352       | 2 | 121.051368 | rs3722681      | 3 | 110.165817 |
| rs13476746      | 2 | 122.660089 | rs6242665      | 3 | 111.412955 |
| rs13476755      | 2 | 124.470148 | rs6214597      | 3 | 117.350554 |
| rs3697020       | 2 | 125.287975 | rs13477498     | 3 | 153.484447 |
| rs6411422       | 2 | 128.122514 | rs6331755      | 3 | 156.678486 |
| rs6161193       | 2 | 129.466095 | rs3667025      | 3 | 158.614152 |
| rs3699051       | 2 | 132.104826 | rs13477528     | 3 | 160.447976 |
| rs13476788      | 2 | 135.061275 | rs13477534     | 4 | 4.046388   |
| rs13476794      | 2 | 136.490987 | rs13477546     | 4 | 7.682681   |
| rs3710324       | 2 | 136.973991 | rs13477592     | 4 | 19.653411  |
| rs13476805      | 2 | 139.473083 | rs13477599     | 4 | 21.606001  |
| rs6303304       | 2 | 141.192338 | rs13477617     | 4 | 27.105003  |
| rs6360457       | 2 | 141.929558 | rs13477637     | 4 | 33.888067  |
| gnf02.141.261   | 2 | 142.837835 | rs13477662     | 4 | 39.882315  |
| rs6195594       | 2 | 143.346715 | CZECH-         |   |            |
| rs3696870       | 2 | 147.404525 | 4_46713961     | 4 | 46.713961  |
| rs13476827      | 2 | 148.284246 | rs3676423      | 4 | 51.03541   |
| rs3676033       | 2 | 149.197838 | UT_4_57.645957 | 4 | 57.161636  |
| rs3719352       | 3 | 10.752146  | rs13477735     | 4 | 60.185456  |
| rs3694133       | 3 | 12.562659  | rs13477741     | 4 | 62.556359  |
| rs6398851       | 3 | 14.447458  | CEL-4_74066970 | 4 | 74.06697   |
| rs13476992      | 3 | 16.59583   | rs6258088      | 4 | 80.891223  |
| rs13477043      | 3 | 31.257023  | rs13477813     | 4 | 82.905304  |
| rs13477046      | 3 | 32.50179   | rs3726736      | 4 | 102.512069 |
| rs6363066       | 3 | 57.943185  | rs13477895     | 4 | 104.999653 |
| rs6239288       | 3 | 60.673679  | rs3695162      | 4 | 107.621073 |
| rs3696955       | 3 | 63.295533  | rs3670382      | 4 | 109.18677  |

|                 |   |            |                 |   |            |
|-----------------|---|------------|-----------------|---|------------|
| rs3694396       | 4 | 112.812399 | rs13478521      | 5 | 125.897723 |
| rs3696331       | 4 | 115.756451 | rs3661159       | 5 | 128.187011 |
| rs3726907       | 4 | 118.140601 | rs13478546      | 5 | 133.978719 |
| gnf04.117.960   | 4 | 120.989378 | rs6334078       | 5 | 136.117818 |
| rs3671259       | 4 | 123.272188 | rs6319445       | 5 | 139.022464 |
| rs13477972      | 4 | 126.623471 | rs3023061       | 5 | 141.390786 |
| rs6268364       | 4 | 149.902058 | rs6191249       | 5 | 143.668186 |
| rs3693138       | 4 | 152.591465 | rs3668534       | 5 | 145.8327   |
| rs3693087       | 4 | 154.007691 | rs3692702       | 5 | 147.670924 |
| rs13478092      | 5 | 3.601413   | rs3655269       | 6 | 17.7151    |
| rs13478104      | 5 | 7.984264   | rs13478656      | 6 | 21.755667  |
| rs3714258       | 5 | 11.417181  | rs3684860       | 6 | 48.907491  |
| CEL-5_14611794  | 5 | 14.611794  | rs3023069       | 6 | 52.190471  |
| gnf05.014.723   | 5 | 19.14048   | rs13478761      | 6 | 53.702681  |
| rs13478133      | 5 | 19.993162  | rs6215332       | 6 | 60.960747  |
| UT_5_19.849706  | 5 | 20.127688  | mhcCD8b4        | 6 | 71.532444  |
| rs13478136      | 5 | 20.633475  | rs3672029       | 6 | 75.631345  |
| rs13478138      | 5 | 21.021884  | rs13478841      | 6 | 78.477103  |
| rs13478145      | 5 | 23.049118  | rs3698364       | 6 | 81.140583  |
| rs6349956       | 5 | 23.273638  | rs6268125       | 6 | 87.214811  |
| rs3706626       | 5 | 23.524916  | rs13478891      | 6 | 92.361613  |
| CEL-5_24211033  | 5 | 24.211033  | rs6292642       | 6 | 104.934072 |
| rs13478151      | 5 | 24.590157  | rs3655148       | 6 | 108.183645 |
| rs3705209       | 5 | 24.811094  | rs6204829       | 6 | 116.303467 |
| rs3699500       | 5 | 25.485429  | rs13478997      | 6 | 118.461935 |
| rs3668113       | 5 | 26.583853  | rs3695724       | 6 | 120.403722 |
| rs13478157      | 5 | 26.724567  | CEL-6_122563022 | 6 | 122.563022 |
| rs3680434       | 5 | 27.162034  | gnf06.122.747   | 6 | 124.630688 |
| rs3682333       | 5 | 30.357756  | rs3670851       | 6 | 129.225234 |
| UT_5_30.642219  | 5 | 30.705556  | rs6339546       | 6 | 134.019679 |
| rs13459083      | 5 | 30.900782  | rs8268650       | 6 | 141.660661 |
| rs3700706       | 5 | 31.071103  | rs6283083       | 6 | 144.006253 |
| rs6408534       | 5 | 33.877338  | rs6387265       | 6 | 145.879903 |
| CEL-5_34263494  | 5 | 34.263494  | rs13479092      | 6 | 147.7388   |
| rs3716195       | 5 | 40.684934  | CEL-7_6502564   | 7 | 6.502564   |
| rs6276465       | 5 | 40.835483  | rs13479140      | 7 | 8.646169   |
| rs13478210      | 5 | 41.410481  | rs13479163      | 7 | 16.00115   |
| rs13478212      | 5 | 41.787529  | mCV25220583     | 7 | 17.994561  |
| rs13478215      | 5 | 42.528407  | rs4226520       | 7 | 18.75874   |
| mCV27558149     | 5 | 64.412079  | gnf07.032.360   | 7 | 27.852716  |
| gnf05.061.650   | 5 | 65.952319  | gnf07.032.889   | 7 | 28.379711  |
| rs3722245       | 5 | 74.543251  | CEL-7_29429804  | 7 | 29.429804  |
| rs13478428      | 5 | 99.993018  | rs6313526       | 7 | 32.302462  |
| rs4225398       | 5 | 105.084101 | rs3703247       | 7 | 33.404727  |
| rs6224339       | 5 | 110.516973 | rs6295036       | 7 | 33.671286  |
| rs3663141       | 5 | 114.196024 | rs13479234      | 7 | 35.506778  |
| mCV25130934     | 5 | 117.090128 | CEL-7_36545579  | 7 | 36.545579  |
| CEL-5_120064766 | 5 | 120.064766 | rs13479238      | 7 | 36.904642  |
| rs13478508      | 5 | 122.876611 | rs13479258      | 7 | 41.532185  |

|                |   |            |                  |    |            |
|----------------|---|------------|------------------|----|------------|
| gnf07.050.858  | 7 | 44.11275   | rs13480285       | 9  | 76.908789  |
| rs6388842      | 7 | 44.912991  | rs13480308       | 9  | 83.133092  |
| mCV23672419    | 7 | 45.173762  | rs13480317       | 9  | 86.214826  |
| rs3693038      | 7 | 45.306964  | rs6309331        | 9  | 92.107776  |
| rs13479274     | 7 | 45.712494  | rs3725272        | 9  | 95.000478  |
| rs13479276     | 7 | 46.065034  | rs13480364       | 9  | 98.019775  |
| rs13479277     | 7 | 46.313106  | rs6377847        | 9  | 100.692014 |
| rs6160140      | 7 | 53.312532  | rs13480436       | 9  | 114.857586 |
| rs3705155      | 7 | 55.55709   | rs6302293        | 9  | 118.240473 |
| rs6405142      | 7 | 55.615198  | gnf09.117.044    | 9  | 119.540217 |
| rs13479317     | 7 | 56.524353  | gnf10.004.219    | 10 | 3.088178   |
| rs3693876      | 7 | 56.589457  | rs13480480       | 10 | 7.4464     |
| gnf07.064.092  | 7 | 56.675124  | rs13480493       | 10 | 9.914514   |
| rs13479319     | 7 | 56.83062   | rs6192001        | 10 | 12.394109  |
| rs3657147      | 7 | 57.152088  | rs13480506       | 10 | 14.854057  |
| rs13479321     | 7 | 57.294626  | rs3696055        | 10 | 17.883074  |
| rs13479334     | 7 | 60.382457  | rs13480525       | 10 | 18.959895  |
| mCV25303361    | 7 | 60.653332  | rs6410821        | 10 | 21.805932  |
| rs13479338     | 7 | 61.105319  | rs13480606       | 10 | 47.620358  |
| rs3716002      | 7 | 61.171781  | rs13480629       | 10 | 67.390746  |
| rs13479425     | 7 | 86.603215  | CEL-10_73933097  | 10 | 73.933097  |
| rs13479427     | 7 | 87.305015  | rs3165937        | 10 | 75.71362   |
| rs13479506     | 7 | 112.15241  | rs13480674       | 10 | 83.171156  |
| rs3687061      | 7 | 115.134183 | rs13480720       | 10 | 97.074107  |
| gnf07.129.013  | 7 | 119.827503 | rs3705990        | 10 | 99.186438  |
| rs3663988      | 7 | 126.965988 | mCV24206699      | 10 | 106.695924 |
| rs3694208      | 8 | 14.730616  | CEL-10_109935001 | 10 | 109.935001 |
| rs13479627     | 8 | 18.663422  | CEL-10_119602638 | 10 | 119.602638 |
| rs13479741     | 8 | 46.240949  | rs13480804       | 10 | 123.197828 |
| mCV23056731    | 8 | 55.932578  | rs13480818       | 10 | 126.541735 |
| rs3726906      | 8 | 58.201849  | rs13480839       | 11 | 4.125911   |
| UT_8_61.137722 | 8 | 60.222067  | rs13480847       | 11 | 6.162191   |
| rs3712611      | 8 | 65.261034  | rs13480859       | 11 | 8.373216   |
| rs13479813     | 8 | 66.929486  | rs13480869       | 11 | 10.898579  |
| rs3690549      | 8 | 76.12653   | mCV23851630      | 11 | 13.163316  |
| rs6296891      | 8 | 79.15201   | CEL-11_15345124  | 11 | 15.345124  |
| rs8236770      | 8 | 82.939075  | rs13480889       | 11 | 17.360319  |
| rs13479880     | 8 | 86.040626  | rs3678321        | 11 | 19.522724  |
| rs13480026     | 8 | 123.079487 | rs6367881        | 11 | 26.054403  |
| rs4227456      | 8 | 124.053484 | rs3657760        | 11 | 32.856509  |
| rs3711756      | 9 | 34.437206  | rs13480965       | 11 | 35.564301  |
| rs3669224      | 9 | 37.029046  | rs13480997       | 11 | 43.490965  |
| rs13480151     | 9 | 40.150719  | mCV23044839      | 11 | 65.492498  |
| rs13480160     | 9 | 42.760021  | UT_11_68.607315  | 11 | 68.648705  |
| CEL-9_49033157 | 9 | 49.033157  | gnf11.079.978    | 11 | 75.081947  |
| gnf09.058.846  | 9 | 64.854283  | rs13481119       | 11 | 79.159755  |
| rs6174757      | 9 | 68.381485  | rs13481123       | 11 | 81.870816  |
| rs13480267     | 9 | 72.087091  | gnf11.093.966    | 11 | 86.965398  |
| rs13480277     | 9 | 74.403157  | rs13481154       | 11 | 90.012989  |

|                  |    |            |                 |    |            |
|------------------|----|------------|-----------------|----|------------|
| rs3714299        | 11 | 92.73468   | mCV22624058     | 13 | 58.311395  |
| rs3710148        | 11 | 96.196554  | CEL-13_60831741 | 13 | 60.831741  |
| rs3695865        | 11 | 101.350115 | rs6179438       | 13 | 68.057256  |
| rs6384437        | 11 | 103.833223 | rs13481878      | 13 | 70.156974  |
| rs13481226       | 11 | 109.851386 | rs3669221       | 13 | 80.367567  |
| rs13481233       | 11 | 111.472921 | rs13481918      | 13 | 81.984151  |
| rs13481264       | 11 | 119.95554  | rs3655061       | 13 | 86.241392  |
| rs13481276       | 12 | 3.64518    | rs4230027       | 13 | 97.200857  |
| rs3699421        | 12 | 3.922406   | rs3705092       | 13 | 100.020595 |
| rs3655333        | 12 | 23.704034  | rs13481992      | 13 | 102.442609 |
| rs13481380       | 12 | 27.085682  | rs13464858      | 13 | 105.049971 |
| rs6187012        | 12 | 28.579503  | rs13482011      | 13 | 107.432985 |
| rs6223000        | 12 | 29.204179  | rs4230094       | 13 | 110.039545 |
| gnf12.033.545    | 12 | 30.14931   | rs3657414       | 13 | 113.498433 |
| rs6243157        | 12 | 32.296827  | rs6340768       | 14 | 7.266803   |
| rs3689063        | 12 | 50.059458  | rs13482084      | 14 | 8.848582   |
| rs13481465       | 12 | 50.509782  | rs3719629       | 14 | 12.874743  |
| rs3662939        | 12 | 54.082727  | gnf14.019.954   | 14 | 22.731865  |
| rs13481480       | 12 | 54.343362  | rs13482122      | 14 | 27.054167  |
| rs3674641        | 12 | 55.129109  | rs6155573       | 14 | 29.837255  |
| rs13481486       | 12 | 55.941001  | rs3722090       | 14 | 32.565225  |
| rs3721804        | 12 | 56.413174  | mCV23384307     | 14 | 41.762771  |
| rs13481488       | 12 | 56.527832  | rs13482179      | 14 | 43.710903  |
| rs13481499       | 12 | 59.639662  | rs3140262       | 14 | 45.774656  |
| rs3686891        | 12 | 60.735544  | rs6392664       | 14 | 47.364134  |
| rs4137680        | 12 | 61.533001  | rs13482194      | 14 | 47.801247  |
| rs3686378        | 12 | 63.477601  | rs13482214      | 14 | 53.590138  |
| rs13481522       | 12 | 66.97148   | rs6161506       | 14 | 56.25048   |
| rs13481531       | 12 | 69.626283  | rs13482225      | 14 | 56.692261  |
| mCV23169261      | 12 | 72.254494  | rs6179045       | 14 | 57.017412  |
| rs6318521        | 12 | 74.957568  | CEL-14_65598536 | 14 | 65.598536  |
| rs3696951        | 12 | 77.991846  | rs3668373       | 14 | 66.081018  |
| rs8259763        | 12 | 82.491932  | rs6156908       | 14 | 66.473686  |
| rs13481583       | 12 | 84.94215   | gnf14.069.419   | 14 | 66.681374  |
| rs13481589       | 12 | 86.779666  | UT_14_66.802733 | 14 | 66.99281   |
| rs3679514        | 12 | 92.576929  | rs13482259      | 14 | 68.392545  |
| rs3698001        | 12 | 95.092951  | rs6298191       | 14 | 69.251728  |
| gnf12.101.501    | 12 | 97.964429  | CEL-14_71690454 | 14 | 71.690454  |
| CEL-12_101776500 | 12 | 101.7765   | rs3023412       | 14 | 72.111198  |
| rs13481650       | 12 | 105.932708 | CEL-14_72264521 | 14 | 72.264521  |
| rs6198959        | 13 | 11.008611  | rs6325141       | 14 | 73.875166  |
| rs3721858        | 13 | 16.752051  | rs13482273      | 14 | 74.295489  |
| rs13481715       | 13 | 18.523821  | rs13482301      | 14 | 81.862571  |
| rs13481743       | 13 | 31.273115  | rs3725470       | 14 | 82.281581  |
| rs3727136        | 13 | 33.688045  | gnf14.085.610   | 14 | 82.796068  |
| gnf13.045.330    | 13 | 46.738859  | rs6395984       | 14 | 82.944063  |
| rs6209128        | 13 | 51.80716   | rs6407863       | 14 | 83.212623  |
| rs13481817       | 13 | 53.966943  | rs13482306      | 14 | 83.42809   |
| rs3700819        | 13 | 56.358945  | rs3706761       | 14 | 83.865561  |

|                 |     |            |                 |    |           |
|-----------------|-----|------------|-----------------|----|-----------|
| rs3655019       | 14  | 83.873573  | rs6309949       | 17 | 10.69913  |
| rs6291434       | 14  | 83.88723   | rs3674166       | 17 | 11.214621 |
| rs6176735       | 14  | 84.102001  | rs3674900       | 17 | 11.922826 |
| rs6299927       | 14  | 84.309814  | gnf17.011.487   | 17 | 12.376655 |
| rs4139735       | 14  | 84.482998  | rs3723317       | 17 | 12.406402 |
| rs13482309      | 14  | 84.549347  | rs6270865       | 17 | 15.307109 |
| CEL-14_85152539 | 14  | 85.152539  | rs3667748       | 17 | 15.457982 |
| rs13482311      | 14  | 85.28705   | rs3721884       | 17 | 16.225206 |
| rs13482312      | 14  | 85.438583  | rs4231344       | 17 | 22.269867 |
| rs3718262       | 14  | 85.692909  | rs3724223       | 17 | 32.068525 |
| rs13482313      | 14  | 85.873792  | UT_17_33.238924 | 17 | 32.099572 |
| rs13482314      | 14  | 86.050411  | rs8242408       | 17 | 32.690515 |
| rs3708779       | 14  | 103.068    | mhcTNFa7        | 17 | 33.6972   |
| rs3683221       | 14  | 104.867978 | rs3682923       | 17 | 34.343989 |
| rs3707842       | 14  | 111.967694 | rs6298471       | 17 | 35.059374 |
| rs13482409      | 14  | 114.979966 | rs13482974      | 17 | 36.98639  |
| rs13482416      | 14  | 117.011917 | rs8254221       | 17 | 38.94185  |
| rs13482418      | 15  | 3.49896    | mCV25197172     | 17 | 41.0809   |
| rs3693019       | 15  | 7.948918   | rs8273969       | 17 | 52.02091  |
| rs3714169       | 15  | 21.816884  | rs13483042      | 17 | 53.781849 |
| rs13482490      | 15  | 26.813067  | mCV22888090     | 17 | 61.947366 |
| rs6210607       | 15  | 30.253148  | rs3675634       | 17 | 69.670995 |
| rs6187312       | 15  | 31.266214  | rs13483139      | 17 | 83.294259 |
| CEL-15_58115663 | 15  | 58.115663  | rs3667051       | 17 | 88.400292 |
| rs3701449       | 15  | 60.283849  | CEL-17_91401354 | 17 | 91.401354 |
| rs13482605      | 15  | 62.435922  | rs13483179      | 17 | 93.216106 |
| rs13482618      | 15  | 66.126656  | rs13483210      | 18 | 12.147024 |
| rs3697744       | 15  | 87.041436  | rs13483217      | 18 | 14.478102 |
| rs3716673       | 15  | 92.579012  | rs13483230      | 18 | 17.674697 |
| rs6285067       | 15  | 95.741617  | rs3656185       | 18 | 19.941646 |
| rs13482734      | 15  | 99.184112  | rs3691362       | 18 | 30.05309  |
| rs3690173       | 15  | 101.419686 | rs3714096       | 18 | 36.136675 |
| mCV25142331     | N/A | N/A        | rs6302276       | 18 | 39.612385 |
| rs4166445       | 16  | 28.119031  | rs13483319      | 18 | 41.351739 |
| rs4168890       | 16  | 31.10743   | gnf18.043.155   | 18 | 45.21264  |
| rs4170974       | 16  | 32.825259  | rs6334596       | 18 | 55.31767  |
| rs4172915       | 16  | 35.504262  | rs13483378      | 18 | 57.789927 |
| rs4174174       | 16  | 37.637201  | rs6364818       | 18 | 59.921604 |
| rs4175353       | 16  | 38.902653  | rs6350869       | 18 | 61.07351  |
| rs4197416       | 16  | 66.683459  | rs6346101       | 18 | 69.04019  |
| rs3656592       | 16  | 87.019209  | rs13483433      | 18 | 72.937807 |
| rs4217061       | 16  | 90.320114  | rs13483466      | 18 | 82.712912 |
| rs4220668       | 16  | 95.392761  | rs13483472      | 18 | 84.261455 |
| rs3164088       | 16  | 97.1111    | rs13483500      | 19 | 3.744813  |
| rs3694629       | 17  | 6.436726   | rs3671671       | 19 | 4.208173  |
| rs3702484       | 17  | 9.103503   | rs3713033       | 19 | 4.818261  |
| mCV22941359     | 17  | 9.24339    | rs13483505      | 19 | 4.836043  |
| rs3662575       | 17  | 9.388595   | rs13483510      | 19 | 6.160915  |
|                 |     |            | rs13483511      | 19 | 6.331751  |

|                 |    |           |                 |   |            |
|-----------------|----|-----------|-----------------|---|------------|
| rs3023477       | 19 | 7.133376  | rs13483834      | X | 67.880612  |
| CEL-19_8529644  | 19 | 8.529644  | CEL-X_68179178  | X | 68.179178  |
| UT_19_10.709331 | 19 | 9.813271  | CEL-X_68645226  | X | 68.645226  |
| rs6163293       | 19 | 9.899424  | rs13483838      | X | 68.74927   |
| rs3700209       | 19 | 10.19721  | CEL-X_71104123  | X | 71.104123  |
| rs3688406       | 19 | 11.531705 | CEL-X_71438949  | X | 71.438949  |
| rs6237846       | 19 | 12.452484 | rs13483849      | X | 71.752528  |
| CEL-19_12595293 | 19 | 12.595293 | CEL-X_72627341  | X | 72.627341  |
| CEL-19_12911424 | 19 | 12.911424 | CEL-X_72697823  | X | 72.697823  |
| rs3692733       | 19 | 13.056443 | CEL-X_73027245  | X | 73.027245  |
| rs3694570       | 19 | 13.056716 | gnfX.070.167    | X | 73.485959  |
| rs3662712       | 19 | 15.964901 | rs13483858      | X | 73.756646  |
| rs3669192       | 19 | 16.124735 | CEL-X_74073918  | X | 74.073918  |
| rs3686467       | 19 | 16.159229 | rs13483862      | X | 74.580193  |
| rs8267310       | 19 | 16.991104 | rs13483863      | X | 74.827617  |
| rs13483555      | 19 | 19.177412 | CEL-X_74985293  | X | 74.985293  |
| gnf19.017.711   | 19 | 19.28395  | CEL-X_75125049  | X | 75.125049  |
| rs3720318       | 19 | 19.458954 | rs13483864      | X | 75.392167  |
| rs13483557      | 19 | 19.479228 | rs13483877      | X | 78.499387  |
| rs13483563      | 19 | 20.842526 | rs13483803      | X | 81.225989  |
| rs6392565       | 19 | 21.461474 | gnfX.076.619    | X | 84.227028  |
| rs3672759       | 19 | 21.707322 | rs13483888      | X | 86.725106  |
| rs3653630       | 19 | 21.729294 | rs13483898      | X | 89.327593  |
| rs13483571      | 19 | 23.62697  | CEL-X_91222960  | X | 91.22296   |
| rs13483577      | 19 | 25.63107  | CEL-X_94143306  | X | 94.143306  |
| rs3090325       | 19 | 26.007713 | rs13483927      | X | 97.613903  |
| rs13483669      | 19 | 51.559161 | rs13483935      | X | 101.057496 |
| rs6257938       | 19 | 52.744319 | rs13483941      | X | 102.845364 |
| CEL-X_44311522  | X  | 44.311522 | rs6221690       | X | 121.042456 |
| rs6411410       | X  | 44.405254 | rs13484004      | X | 123.782683 |
| rs13483753      | X  | 44.656596 | CEL-X_125736335 | X | 125.736335 |
| rs13483756      | X  | 45.475262 | rs13484023      | X | 127.710219 |
| rs13483757      | X  | 45.612522 | rs13484031      | X | 129.847872 |
| rs13483771      | X  | 51.03826  | rs13484040      | X | 131.961674 |
| CEL-X_51185805  | X  | 51.185805 | rs13484043      | X | 132.699243 |
| rs13483777      | X  | 52.741694 | rs13484094      | X | 147.274623 |
| rs13483778      | X  | 53.039702 | rs6365259       | X | 150.148872 |
| rs13483831      | X  | 67.285372 | CEL-X_158112484 | X | 158.112484 |
